# Supplementary material
Source: HighWire-hosted journal article supplement (http://qshc.bmj.com/highwire/filestream/147209/field_highwire_adjunct_files/0/QSHC_SupplementaryAppendix_031625_.pdf)
Supplement: QSHC_SupplementaryAppendix_031625_.pdf [file QSHC_SupplementaryAppendix_031625_.pdf]

**Appendix 1: Percentage responses to HSOPC items**

| <b>Question Number</b> | <b>Item</b>                                                                                                                     | <b>Strongly Disagree</b> | <b>Disagree</b> | <b>Neither Disagree or Agree</b> | <b>Agree</b>            | <b>Strongly Agree</b> |
|------------------------|---------------------------------------------------------------------------------------------------------------------------------|--------------------------|-----------------|----------------------------------|-------------------------|-----------------------|
| A25                    | Patient safety is never sacrificed to get the work done                                                                         | 4.5                      | 19.6            | 16.8                             | 45.8                    | 13.3                  |
| A30                    | Our procedures and systems are good at preventing errors from happening                                                         | 2.0                      | 9.9             | 21.7                             | 59.0                    | 7.4                   |
| A18                    | It is just by chance that serious mistakes don't happen around here                                                             | 13.3                     | 40.3            | 19.0                             | 22.1                    | 5.3                   |
| A28                    | We have patient safety problems in this ward/department                                                                         | 11.5                     | 45.6            | 22.8                             | 17.2                    | 2.8                   |
|                        |                                                                                                                                 | <b>Never</b>             | <b>Rarely</b>   | <b>Sometimes</b>                 | <b>Most of the time</b> | <b>Always</b>         |
| D1                     | When an event occurs, but <u>is caught and identified before affecting the patient</u> , how often is it reported?              | 1.4                      | 10.0            | 23.8                             | 41.6                    | 23.3                  |
| D2                     | When an event occurs, but it has <u>no adverse outcome to the patient</u> , how often is it reported?                           | 0.9                      | 8.4             | 20.6                             | 43.5                    | 26.7                  |
| D3                     | When an event occurs that <u>could have an adverse outcome to the patient</u> but does not, how often is it reported?           | 0.4                      | 5.5             | 16.0                             | 39.4                    | 38.7                  |
|                        |                                                                                                                                 | <b>Strongly Disagree</b> | <b>Disagree</b> | <b>Neither Disagree or Agree</b> | <b>Agree</b>            | <b>Strongly Agree</b> |
| B1                     | My supervisor/manager provides positive feedback when he/she sees a job done according to established patient safety procedures | 5.5                      | 18.4            | 19.9                             | 45.9                    | 10.4                  |
| B2                     | My supervisor/manager seriously considers staff suggestions for improving patient safety                                        | 3.0                      | 7.4             | 16.2                             | 60.4                    | 13.1                  |
| B3                     | Whenever pressure build up, my supervisor/manager wants us to work faster, even if it means taking shortcuts                    | 14.9                     | 53.9            | 17.4                             | 11.3                    | 2.6                   |

**Appendix 1: Percentage responses to HSOPC items**

| <b>Question Number</b> | <b>Item</b>                                                                                  | <b>Never</b> | <b>Rarely</b> | <b>Sometimes</b> | <b>Most of the time</b> | <b>Always</b> |
|------------------------|----------------------------------------------------------------------------------------------|--------------|---------------|------------------|-------------------------|---------------|
| B4                     | My supervisor/manager overlooks patient safety problems that happen repeatedly               | 26.7         | 47.2          | 12.2             | 10.6                    | 3.4           |
| A14                    | We are actively doing things to improve patient safety                                       | 0.8          | 4.6           | 17.8             | 63.1                    | 13.6          |
| A16                    | Mistakes have led to positive changes around here                                            | 1.9          | 8.1           | 24.9             | 59.2                    | 5.9           |
| A22                    | After we make changes to patient safety, we evaluate their effectiveness                     | 1.4          | 12.6          | 28.6             | 52.5                    | 4.9           |
| A1                     | People support one another in this ward/department                                           | 1.0          | 6.4           | 7.4              | 60.8                    | 24.4          |
| A3                     | When a lot of work needs to be done quickly, we work together as a team to get the work done | 1.4          | 6.1           | 8.0              | 63.9                    | 20.6          |
| A7                     | In this ward/department, people treat each other with respect                                | 2.1          | 10.2          | 11.1             | 60.9                    | 15.7          |
| A20                    | When one area in this ward/department gets busy, others help out                             | 7.1          | 23.1          | 15.0             | 45.9                    | 8.0           |
| C3                     | Staff will freely speak up if they see something that may negatively affect patient care     | 0.8          | 4.6           | 21.3             | 49.1                    | 24.2          |
| C8                     | Staff feel free to question the decisions and actions of those with more authority           | 3.7          | 16.2          | 34.3             | 34.3                    | 11.5          |
| C11                    | Staff are afraid to ask questions where something doesn't seem right                         | 2.2          | 8.4           | 30.0             | 42.8                    | 16.7          |
| C1                     | We are given feedback about changes put into place based on event reports                    | 3.3          | 15.3          | 33.2             | 36.1                    | 12.2          |
| C7                     | We are informed about events that happen in this ward/department                             | 2.2          | 10.9          | 27.9             | 42.6                    | 16.5          |
| C9                     | In this ward/department, we discuss ways to prevent events from happening again              | 2.1          | 9.1           | 28.3             | 41.5                    | 19.0          |
| A15                    | Staff feel that their mistakes are held against them                                         | 4.7          | 20.4          | 24.5             | 43.6                    | 6.9           |

**Appendix 1: Percentage responses to HSOPC items**

| <b>Question Number</b> | <b>Item</b>                                                                                     | <b>Never</b> | <b>Rarely</b> | <b>Sometimes</b> | <b>Most of the time</b> | <b>Always</b> |
|------------------------|-------------------------------------------------------------------------------------------------|--------------|---------------|------------------|-------------------------|---------------|
| A26                    | Staff worry that mistakes they make are kept in their personal files                            | 5.6          | 31.1          | 31.0             | 28.1                    | 4.2           |
| A2                     | We have enough staff to handle the workload                                                     | 16.5         | 38.1          | 13.7             | 28.4                    | 3.3           |
| A12                    | Staff in this ward/department work longer hours that is best for patient care                   | 8.5          | 24.6          | 28.9             | 33.8                    | 4.1           |
| A13                    | We use more agency/temporary staff than is best for patient care                                | 2.7          | 11.6          | 18.9             | 40.1                    | 26.7          |
| A24                    | We often work in "crisis mode" trying to do too much, too quickly                               | 13.1         | 39.9          | 19.7             | 24.1                    | 3.2           |
| F10                    | The actions of hospital management show that patient safety is a top priority                   | 4.8          | 19.0          | 31.0             | 37.4                    | 7.7           |
| F11                    | Hospital management seems interested in patient safety only after an adverse event happens      | 8.1          | 36.0          | 23.6             | 27.8                    | 4.6           |
| F4                     | There is good cooperation across hospital wards/departments that need to work together          | 3.4          | 24.7          | 30.2             | 38.5                    | 3.1           |
| F13                    | Hospital wards/departments work well together to provide the best care for patients             | 1.8          | 15.5          | 30.9             | 45.2                    | 6.5           |
| F2                     | Hospital wards/departments do not coordinate well with each other                               | 14.4         | 41.7          | 22.1             | 19.5                    | 2.3           |
| F7                     | It is often unpleasant to work with staff from other hospital wards/departments                 | 2.2          | 12.2          | 30.5             | 46.8                    | 8.3           |
| F3                     | Things "fall between the cracks" when transferring patients from one ward/department to another | 15.6         | 42.7          | 23.6             | 16.4                    | 1.6           |
| F5                     | Important patient care information is often lost during shift changes                           | 6.3          | 27.8          | 25.8             | 34.6                    | 5.5           |
| F9                     | Problems often occur in the exchange of information across hospital wards/departments           | 7.3          | 46.5          | 25.4             | 19.4                    | 1.4           |

**Appendix 1: Percentage responses to HSOPC items**

| <b>Question Number</b> | <b>Item</b>                                                 | <b>Never</b> | <b>Rarely</b> | <b>Sometimes</b> | <b>Most of the time</b> | <b>Always</b> |
|------------------------|-------------------------------------------------------------|--------------|---------------|------------------|-------------------------|---------------|
| F14                    | Shift changes are problematic for patients in this hospital | 3.9          | 23.5          | 35.5             | 31.8                    | 5.4           |

**Appendix 2: Revised 9-dimensional model fitted to the UK data: EFA, CFA and reliability analyses**

| Dimension/ Item                                                             |                                                                                                                                 | Factor Loadings from EFA | Standardised Path Coefficient | Item R <sup>2</sup> from CFA | Reliability of Dimensions |
|-----------------------------------------------------------------------------|---------------------------------------------------------------------------------------------------------------------------------|--------------------------|-------------------------------|------------------------------|---------------------------|
| <b>Frequency of error reporting</b>                                         |                                                                                                                                 |                          |                               |                              | 0.83                      |
| D1                                                                          | When an event occurs, but is <u>caught and identified before affecting the patient</u> , how often is it reported?              | 0.73                     | 0.71                          | 0.51                         |                           |
| D2                                                                          | When an event occurs, but it has <u>no adverse outcome to the patient</u> , how often is it reported?                           | 0.93                     | 0.92                          | 0.85                         |                           |
| D3                                                                          | When an event occurs that <u>could have an adverse outcome to the patient</u> but does not, how often is it reported?           | 0.87                     | 0.75                          | 0.56                         |                           |
| <b>Staffing and overall perceptions of safety</b>                           |                                                                                                                                 |                          |                               |                              | 0.70                      |
| A2                                                                          | We have enough staff to handle the workload                                                                                     | 0.77                     | 0.46                          | 0.21                         |                           |
| A24                                                                         | We often work in “crisis mode” trying to do too much, too quickly                                                               | 0.79                     | 0.56                          | 0.32                         |                           |
| A18                                                                         | It is just by chance that serious mistakes don’t happen around here                                                             | 0.60                     | 0.67                          | 0.45                         |                           |
| A28                                                                         | We have patient safety problems in this ward/department                                                                         | 0.66                     | 0.58                          | 0.33                         |                           |
| <b>Supervisor/manager expectations and actions promoting patient safety</b> |                                                                                                                                 |                          |                               |                              | 0.76                      |
| B1                                                                          | My supervisor/manager provides positive feedback when he/she sees a job done according to established patient safety procedures | 0.85                     | 0.76                          | 0.57                         |                           |
| B2                                                                          | My supervisor/manager seriously considers staff suggestions for improving patient safety                                        | 0.77                     | 0.81                          | 0.65                         |                           |
| <b>Teamwork within units</b>                                                |                                                                                                                                 |                          |                               |                              | 0.78                      |
| A1                                                                          | People support one another in this ward/department                                                                              | 0.78                     | 0.80                          | 0.64                         |                           |
| A3                                                                          | When a lot of work needs to be done quickly, we work                                                                            | 0.80                     | 0.69                          | 0.47                         |                           |

**Appendix 2: Revised 9-dimensional model fitted to the UK data: EFA, CFA and reliability analyses**

| Dimension/ Item                               |                                                                                                          | Factor Loadings from EFA | Standardised Path Coefficient | Item R <sup>2</sup> from CFA | Reliability of Dimensions |
|-----------------------------------------------|----------------------------------------------------------------------------------------------------------|--------------------------|-------------------------------|------------------------------|---------------------------|
| A7                                            | together as a team to get the work done<br>In this ward/department, people treat each other with respect | 0.80                     | 0.82                          | 0.66                         |                           |
| <b>Non-punitive response to error</b>         |                                                                                                          |                          |                               |                              | 0.65                      |
| A15                                           | Staff feel that their mistakes are held against them                                                     | 0.70                     | 0.88                          | 0.78                         |                           |
| A26                                           | Staff worry that mistakes they make are kept in their personal files                                     | 0.88                     | 0.58                          | 0.34                         |                           |
| <b>Communication openness</b>                 |                                                                                                          |                          |                               |                              | 0.67                      |
| C3                                            | Staff will freely speak up if they see something that may negatively affect patient care                 | 0.62                     | 0.70                          | 0.49                         |                           |
| C8                                            | Staff feel free to question the decisions and actions of those with more authority                       | 0.48                     | 0.74                          | 0.55                         |                           |
| C11                                           | Staff are afraid to ask questions where something doesn't seem right                                     | 0.84                     | 0.49                          | 0.24                         |                           |
| <b>Feedback and communication about error</b> |                                                                                                          |                          |                               |                              | 0.80                      |
| C1                                            | We are given feedback about changes put into place based on event reports                                | 0.78                     | 0.73                          | 0.53                         |                           |
| C7                                            | We are informed about events that happen in this ward/department                                         | 0.81                     | 0.75                          | 0.56                         |                           |
| C9                                            | In this ward/department, we discuss ways to prevent events from happening again                          | 0.68                     | 0.77                          | 0.60                         |                           |
| <b>Teamwork across hospital units</b>         |                                                                                                          |                          |                               |                              | 0.73                      |
| A1                                            | People support one another in this ward/department                                                       | 0.76                     | 0.70                          | 0.49                         |                           |
| A3                                            | When a lot of work needs to be done quickly, we work                                                     | 0.76                     | 0.66                          | 0.44                         |                           |

**Appendix 2: Revised 9-dimensional model fitted to the UK data: EFA, CFA and reliability analyses**

|     | <b>Dimension/ Item</b>                                                                          | <b>Factor Loadings from EFA</b> | <b>Standardised Path Coefficient</b> | <b>Item R<sup>2</sup> from CFA</b> | <b>Reliability of Dimensions</b> |
|-----|-------------------------------------------------------------------------------------------------|---------------------------------|--------------------------------------|------------------------------------|----------------------------------|
|     | together as a team to get the work done                                                         |                                 |                                      |                                    |                                  |
| A7  | In this ward/department, people treat each other with respect                                   | 0.68                            | 0.69                                 | 0.48                               |                                  |
|     | <b>Hospital handovers and transitions</b>                                                       |                                 |                                      |                                    | 0.77                             |
| F3  | Things “fall between the cracks” when transferring patients from one ward/department to another | 0.61                            | 0.71                                 | 0.51                               |                                  |
| F5  | Important patient care information is often lost during shift changes                           | 0.81                            | 0.70                                 | 0.48                               |                                  |
| F9  | Problems often occur in the exchange of information across hospital wards/departments           | 0.75                            | 0.74                                 | 0.55                               |                                  |
| F14 | Shift changes are problematic for patients in this hospital                                     | 0.72                            | 0.56                                 | 0.31                               |                                  |
